# Supplementary material for: FeOx@carbon yolk/shell nanowires with tailored void spaces as stable and high-capacity anodes for lithium ion batteries
Source: Royal Society of Chemistry journal article supplement (doi:10.1039/c6ta04351h), 2016-01-01
Supplement: c6ta04351h1.pdf [file c6ta04351h1.pdf]

## Electronic Supplementary Information (ESI)

### **FeO<sub>x</sub>@carbon yolk/shell nanowires with tailored void spaces as stable and high-capacity anodes for lithium ion battery**

Xueying Li,<sup>a,b</sup> Yuanyuan Ma,<sup>\*a,c</sup> Guozhong Cao<sup>d</sup> and Yongquan Qu,<sup>\*a,c</sup>

<sup>a</sup> *Center for Applied Chemical Research, Frontier Institute of Science and Technology, and State Key Laboratory for Mechanical Behavior of Materials, Xi'an Jiaotong University, Xi'an, 710049, China*

<sup>b</sup> *School of Environmental and Chemical Engineering, Jiangsu University of Science and Technology, Zhenjiang, 212003, China.*

<sup>c</sup> *MOE Key Laboratory for Nonequilibrium Synthesis and Modulation of Condensed Matter, Xi'an Jiaotong University, Xi'an, 710049, China*

<sup>d</sup> *Department of Materials and Engineering, University of Washington, Seattle, Washington, 98195-2120, United States*

\*To whom correspondence should be addressed: [yyma@mail.xjtu.edu.cn](mailto:yyma@mail.xjtu.edu.cn);

[yongquan@mail.xjtu.edu.cn](mailto:yongquan@mail.xjtu.edu.cn)

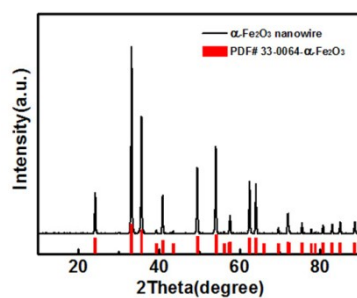

**Fig. S1** The XRD pattern of  $\alpha$ -Fe<sub>2</sub>O<sub>3</sub> nanowires

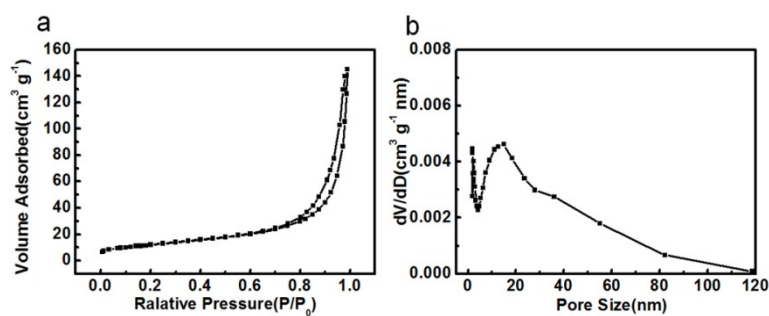

**Fig. S2** (a) N<sub>2</sub> adsorption-desorption isotherms profile of  $\alpha$ -Fe<sub>2</sub>O<sub>3</sub> nanowires; (b) Pore size distribution of  $\alpha$ -Fe<sub>2</sub>O<sub>3</sub> nanowires

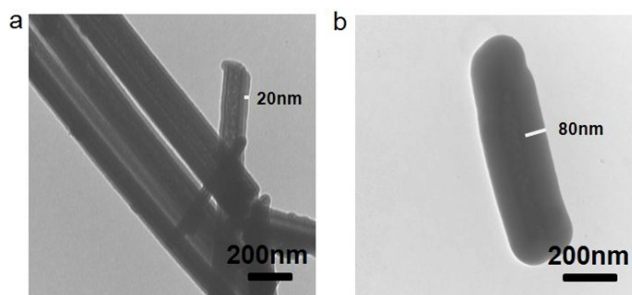

**Fig. S3**  $\alpha$ -Fe<sub>2</sub>O<sub>3</sub>@SiO<sub>2</sub> with different thickness of silica layer (a) 20nm; (b) 80nm

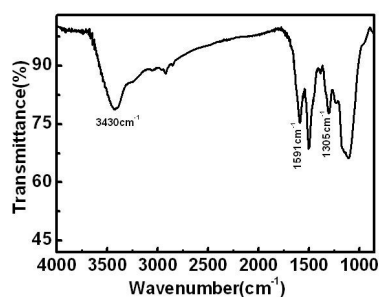

**Fig. S4** The FT-IR spectra of  $\alpha$ -Fe<sub>2</sub>O<sub>3</sub>@SiO<sub>2</sub>@PAN

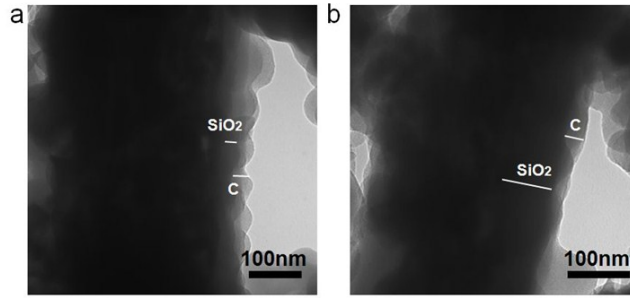

**Fig. S5** (a) TEM image of  $\text{FeO}_x@SiO_2@C-20$ ; (b) TEM image of  $\text{FeO}_x@SiO_2@C-80$

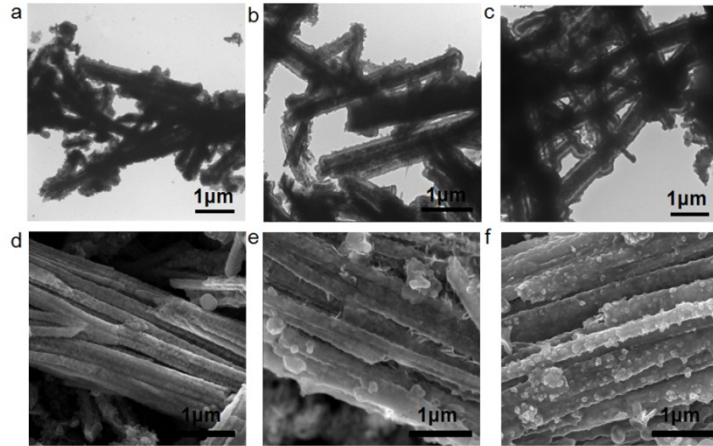

**Fig. S6** (a, d) TEM image and SEM image of  $\text{FeO}_x@C-20$ ; (b, e) TEM image and SEM image of  $\text{FeO}_x@C-40$ ; (c, f) TEM image and SEM image of  $\text{FeO}_x@C-80$ .

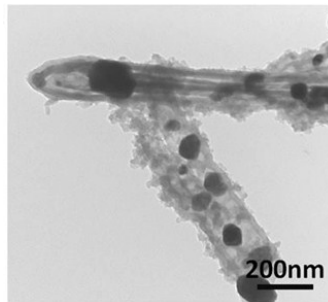

**Fig. S7** TEM image of  $\alpha\text{-Fe}_2\text{O}_3@C$  nanowires without the step of silica layer coating

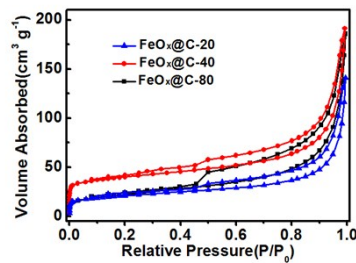

|              | $\text{FeO}_x@C-20$    | $\text{FeO}_x@C-40$    | $\text{FeO}_x@C-80$     |
|--------------|------------------------|------------------------|-------------------------|
| Surface area | 60.4 m <sup>2</sup> /g | 84.6 m <sup>2</sup> /g | 100.5 m <sup>2</sup> /g |
| Pore size    | 13.9 nm                | 12.6 nm                | 11.5 nm                 |

**Fig. S8**  $N_2$  adsorption-desorption isotherms profile of  $\text{FeO}_x@C$  yolk-shell nanowires

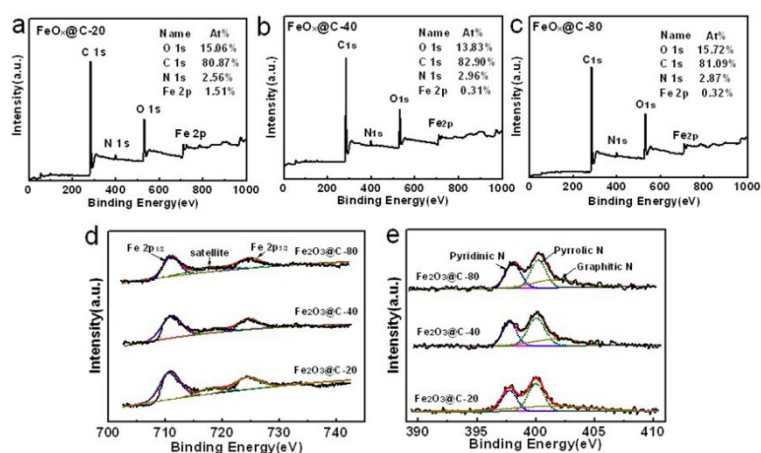

**Fig. S9** (a) The XPS spectra of  $\text{FeO}_x\text{@C-20}$ ; (b) The XPS spectra of  $\text{FeO}_x\text{@C-40}$ ; (c) The XPS spectra of  $\text{FeO}_x\text{@C-80}$ ; (d) The high resolution of Fe 2p for these three  $\text{FeO}_x\text{@C}$  yolk-shell structures; (e) The high resolution of N 1s for these three  $\text{FeO}_x\text{@C}$  yolk-shell structures

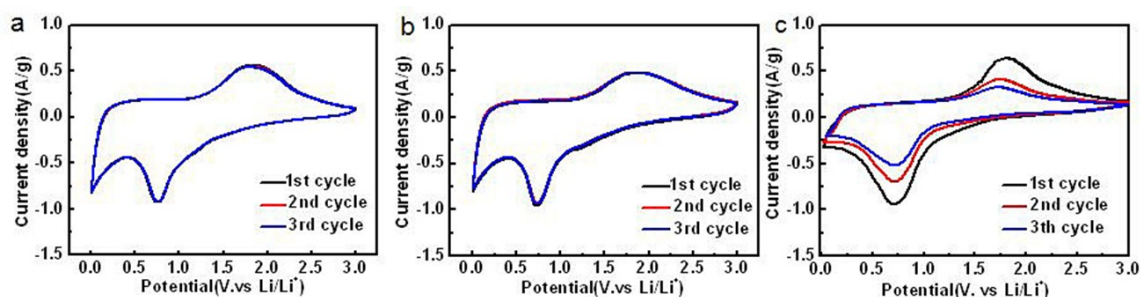

**Fig. S10** (a) CV curves of  $\text{FeO}_x\text{@C-20}$  yolk-shell nanowires at a scan rate of  $0.5\text{mV/s}$  in the potential range from  $0\text{V}$  to  $3.0\text{V}$  vs.  $\text{Li/Li}^+$ ; (b) CV curves of  $\text{FeO}_x\text{@C-80}$  yolk-shell nanowires at a scan rate of  $0.5\text{mV/s}$  in the potential range from  $0\text{V}$  to  $3.0\text{V}$  vs.  $\text{Li/Li}^+$ ; (c) CV curves of bare  $\alpha\text{-Fe}_2\text{O}_3$  nanowires at a scan rate of  $0.5\text{mV/s}$  in the potential range from  $0\text{V}$  to  $3.0\text{V}$  vs.  $\text{Li/Li}^+$

**Tab. S1** The volume of FeO<sub>x</sub>, void space and the lithiated FeO<sub>x</sub> in three samples

| Parameters                                           | FeO <sub>x</sub> @C-20 | FeO <sub>x</sub> @C-40 | FeO <sub>x</sub> @C-80 |
|------------------------------------------------------|------------------------|------------------------|------------------------|
| R <sub>FeO<sub>x</sub></sub> (nm)                    | 75                     | 75                     | 75                     |
| R <sub>(FeO<sub>x</sub>+void)</sub> (nm)             | 93                     | 107                    | 149                    |
| L (nm)                                               | L                      | L                      | L                      |
| V <sub>FeO<sub>x</sub></sub> (nm <sup>3</sup> )      | 17671 × L              | 17671 × L              | 17671 × L              |
| V <sub>(FeO<sub>x</sub>+void)</sub>                  | 27171 × L              | 35968 × L              | 69746 × L              |
| V <sub>void</sub>                                    | 9500 × L               | 18297 × L              | 52075 × L              |
| r (V <sub>void</sub> /V <sub>FeO<sub>x</sub></sub> ) | 0.54                   | 1.04                   | 2.94                   |

The data in the table are obtained by the following formula:

$$V = \pi R^2 L,$$

$$V_{\text{void}} = V_{(\text{FeO}_x + \text{void})} - V_{\text{FeO}_x},$$

**V** represents the volume of materials, **R** represents the radius of materials, **L** represents the length of the materials. The values of **R** in the formula are the statistical averages from the TEM images.

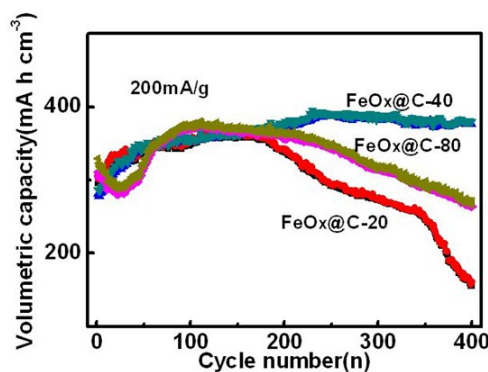**Fig. S11** The volumetric capacities versus cycle number of three FeO<sub>x</sub>@C yolk/shell nanowires at 200mA/g for 400cycles.
